# Supplementary material
Source: Royal Society of Chemistry journal article supplement (doi:10.1039/d6ta02075e)
Supplement: d6ta02075e1.pdf [file d6ta02075e1.pdf]

## Supporting Information

### **Simultaneous enhancement of power factor and suppression of thermal conductivity in bulk $\text{TFe}_{1.6}\text{Se}_2$ via embedded atomically thin FeSe layers**

*Xinyi He*<sup>1,2,§</sup>, *Katsuma Ogata*<sup>1,§</sup>, *Terumasa Tadano*<sup>3</sup>, *Hidenori Hiramatsu*<sup>1,4</sup>, *Toshio Kamiya*<sup>1,4</sup>,  
*and Takayoshi Katase*<sup>1,\*</sup>

<sup>1</sup> Materials and Structures Laboratory, Institute of Integrated Research, Institute of Science Tokyo, 4259 Nagatsuta, Midori, Yokohama, 226-8501, Japan

<sup>2</sup> Kanagawa Institute of Industrial Science and Technology, 705-1 Shimoimaizumi, Ebina, Kanagawa 243-0435, Japan

<sup>3</sup> Research Center for Magnetic and Spintronic Materials, National Institute for Materials Science, 1-2-1 Sengen, Tsukuba, Ibaraki 305-0047, Japan

<sup>4</sup> MDX Research Center for Element Strategy, Institute of Integrated Research, Institute of Science Tokyo, 4259 Nagatsuta, Midori, Yokohama 226-8501, Japan

\* Correspondence to: [katase.t.aa@m.titech.ac.jp](mailto:katase.t.aa@m.titech.ac.jp)

## Contents

Fig. S1. Microstructure of  $\text{TlFe}_{1.6}\text{Se}_2$  bulk sample.

Fig. S2. XRD pattern of FeSe bulk sample

Fig. S3. Temperature dependence of thermal diffusivity, heat capacity, and electronic thermal conductivity for  $\text{TlFe}_{1.6}\text{Se}_2$  and FeSe bulk samples.

Fig. S4. Decomposition of the contributions in the  $ZT$  change across the  $V_{\text{Fe}}$  order–disorder transition.

Fig. S5. Temperature dependence of the calculated  $\kappa_{\text{lat}}$  for  $\text{TlFe}_{1.6}\text{Se}_2$  and FeSe with and without the contribution from the coherent term.

Fig. S6. Fully-relaxed crystal structures of  $\text{TlFe}_{1.6}\text{Se}_2$  and FeSe models.

Fig. S7. Comparison of the second-order interatomic force constants (IFCs) of Fe-Se for  $\text{TlFe}_{1.6}\text{Se}_2$  and FeSe.

Fig. S8. Three-phonon scattering phase space (SPS) for  $\text{TlFe}_{1.6}\text{Se}_2$  and FeSe.

## Crystal structure and microstructures

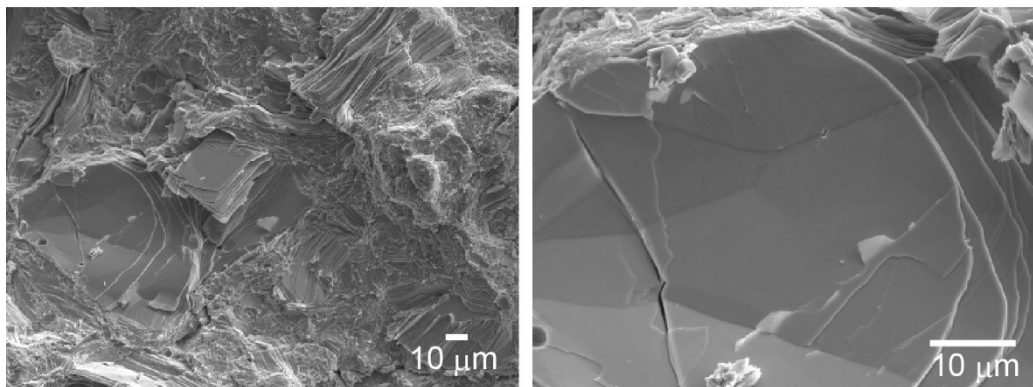

**Figure S1.** Microstructure of the broken-out surface of  $\text{TlFe}_{1.6}\text{Se}_2$  bulk polycrystal observed by EPMA. The average chemical composition based on 10-point EPMA analysis was  $\text{Tl} : \text{Fe} : \text{Se} = 1 : 1.67 : 1.97$ .

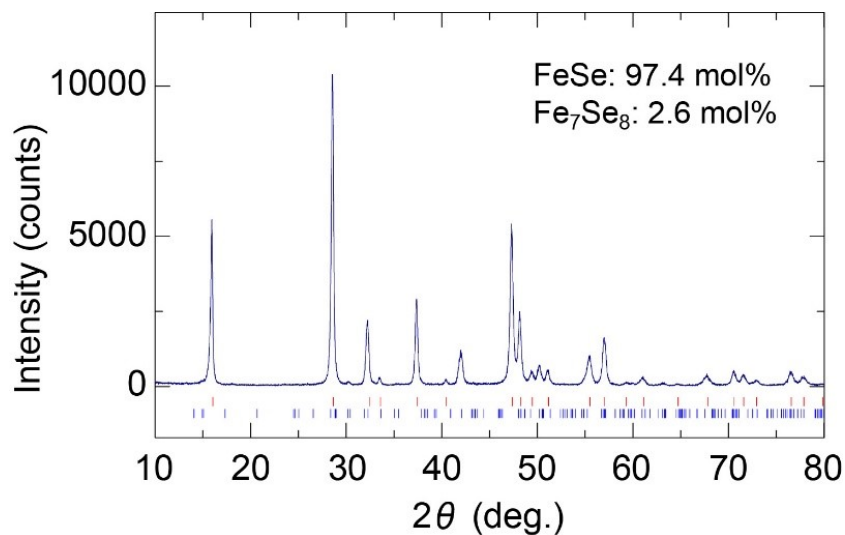

**Figure S2.** (a) XRD pattern of FeSe bulk sample at RT. The main diffraction peaks were assigned to  $\alpha$ -FeSe phase (space group:  $P4/nmm$ ), while a small amount of impurity phase of  $\text{Fe}_7\text{Se}_8$  ( $P3_121$ ) were detected.



## Thermal transport properties

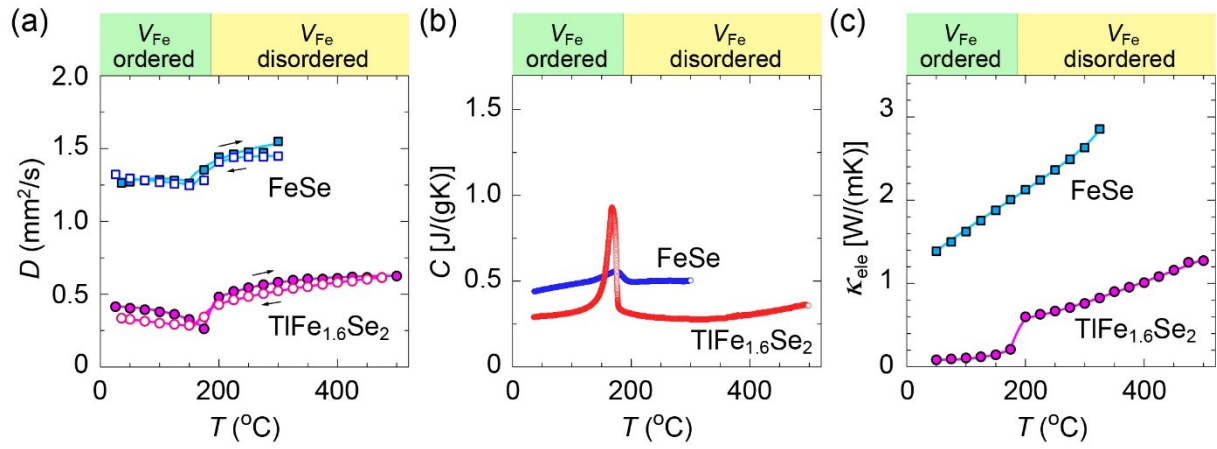

**Figure S3.**  $T$  dependence of (a) thermal diffusivity ( $D$ ), (b) heat capacity ( $C$ ), and (c) electronic thermal conductivity ( $\kappa_{\text{ele}}$ ) for bulk samples of TlFe<sub>1.6</sub>Se<sub>2</sub> and FeSe.

## Thermoelectric property analysis

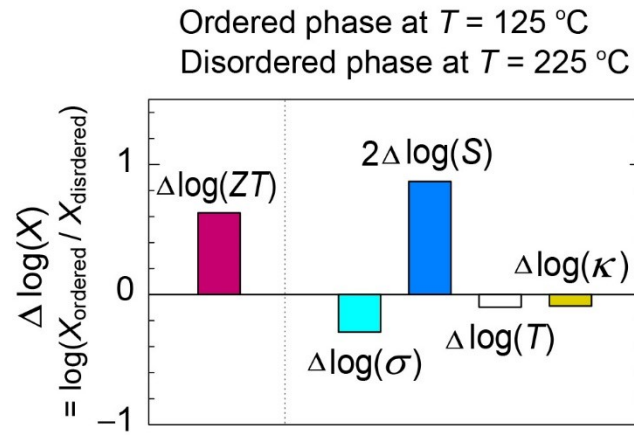

**Figure S4.** Decomposition of the contributions in the  $ZT$  change across the  $V_{\text{Fe}}$  order–disorder transition, evaluated between the  $V_{\text{Fe}}$ -ordered phase at  $125\text{ }^\circ\text{C}$  and the  $V_{\text{Fe}}$ -disordered phase at  $225\text{ }^\circ\text{C}$ . Here,  $\Delta \log(X) = \log(X_{\text{ordered}}/X_{\text{disordered}})$ ; positive (negative) values indicate parameters that enhance (reduce)  $ZT$  in the  $V_{\text{Fe}}$ -ordered phase.

## Calculations

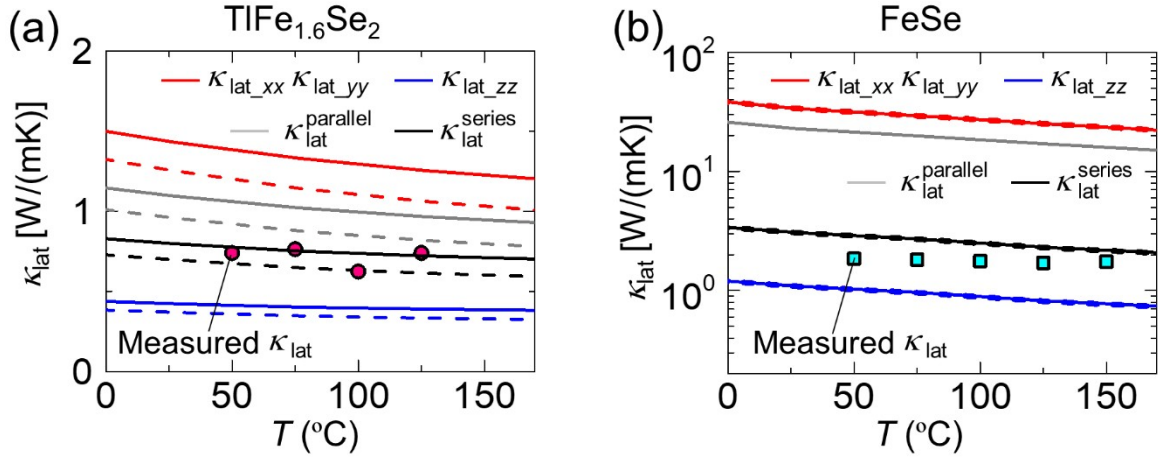

**Figure S5.** Temperature dependence of the calculated  $\kappa_{lat}$  along  $xx$ - and  $yy$ -axes (parallel to  $FeSe$  layer) and the  $zz$ -axis (perpendicular to  $FeSe$  layer) for (a)  $TlFe_{1.6}Se_2$  and (b)  $FeSe$  with (solid lines) and without (dashed lines) the contribution from the coherent term. The averaged

$\kappa_{lat}$  values obtained using the series conduction model ( $\kappa_{lat}^{series} = \left(\frac{1}{\kappa_{xx}} + \frac{1}{\kappa_{yy}} + \frac{1}{\kappa_{zz}}\right)^{-1} \times 3$ )

and the parallel conduction model ( $\kappa_{lat}^{parallel} = \frac{\kappa_{xx} + \kappa_{yy} + \kappa_{zz}}{3}$ ) are also shown. The

experimentally measured  $\kappa_{lat}$  for  $V_{Fe}$ -ordered  $TlFe_{1.6}Se_2$  and  $FeSe$  polycrystals are plotted for comparison.

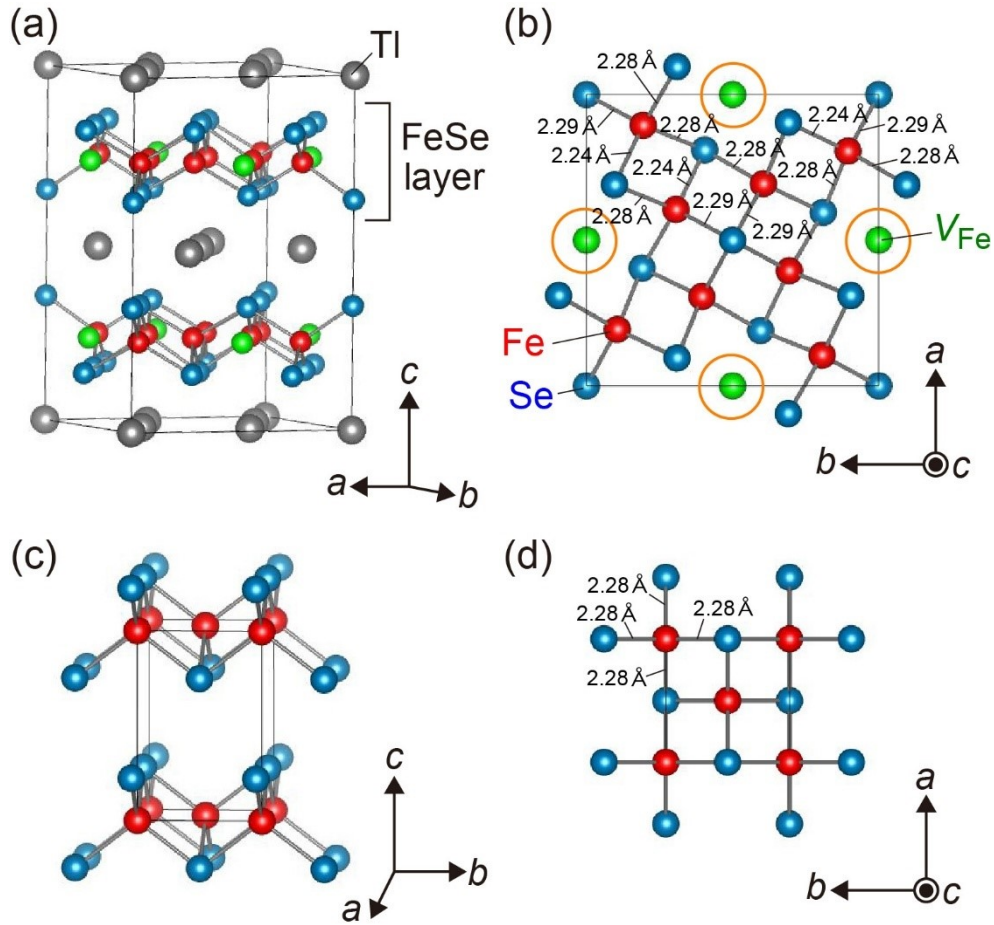

**Figure S6.** Fully relaxed crystal structures of (a,b)  $\text{TlFe}_{1.6}\text{Se}_2$  and (c,d) FeSe models. Tl, Fe, Se atoms are depicted by gray, red, and blue spheres, respectively, and Fe-vacancy ( $V_{\text{Fe}}$ ) sites are indicated by green spheres. The calculated lattice parameters of  $\text{TlFe}_{1.6}\text{Se}_2$  are  $a = b = 8.49 \text{ \AA}$ , and  $c = 12.78 \text{ \AA}$ , respectively. Those of FeSe are  $a = b = 3.615 \text{ \AA}$  and  $c = 5.52 \text{ \AA}$ . In (b), Fe–Se bond lengths in  $\text{TlFe}_{1.6}\text{Se}_2$  are highlighted, illustrating the local bond-length variation around  $V_{\text{Fe}}$  sites. In (d), the Fe–Se bond lengths in FeSe are shown for comparison.

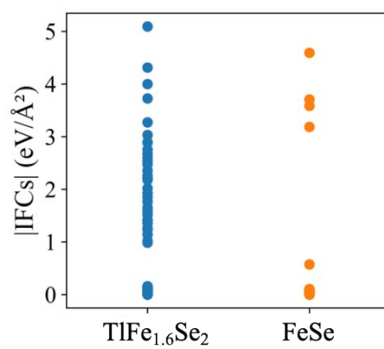

**Figure S7.** Comparison of the second-order interatomic force constants (IFCs) of Fe-Se interactions for TlFe<sub>1.6</sub>Se<sub>2</sub> and FeSe.

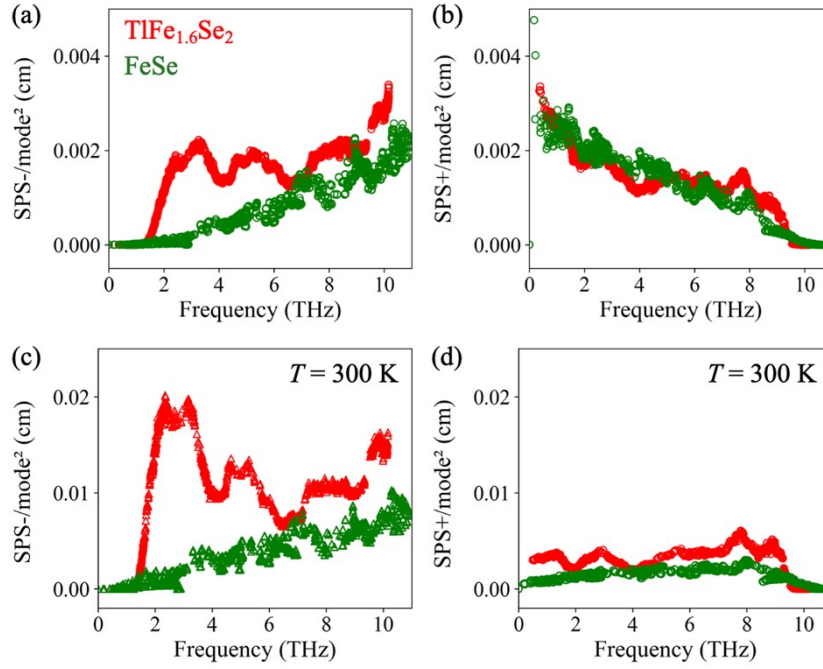

**Figure S8.** Three-phonon scattering phase space (SPS). (a, b) SPS without occupation factors and (c, d) SPS with occupation factors at  $T = 300$  K. The left panels correspond to emission ( $-$ ) processes and the right panels correspond to absorption ( $+$ ) processes. Red markers represent  $\text{TlFe}_{1.6}\text{Se}_2$  and green markers represent  $\text{FeSe}$ . To ensure a consistent comparison between different supercells, the SPS is normalized by the square of the number of phonon modes ( $\text{mode}^2$ ). Compared to  $\text{FeSe}$ , the defective structure  $\text{TlFe}_{1.6}\text{Se}_2$  shows a clear enhancement of the emission ( $-$ ) SPS across the frequency range, particularly in the 1.5–4 THz region, consistent with the reduced phonon lifetimes in this frequency range (**Figure 6b**).
